# Supplementary material for: The C‐degron pathway eliminates mislocalized proteins and products of deubiquitinating enzymes
Source: PubMed Central journal article supplement — EMBO J. 2021 Jan 20;40(7):e105846. doi: 10.15252/embj.2020105846 (PMC8013793; doi:10.15252/embj.2020105846), 2021-01-20
Supplement: EMBJ-40-e105846-s004.pdf [file EMBJ-40-e105846-s004.pdf]

# **Appendix**

**for**

**The C-degron pathway eliminates mislocalized proteins  
and products of deubiquitinating enzymes**

**Yeh et al.**

# Content

|                                                                                                                                                                                                                    |          |
|--------------------------------------------------------------------------------------------------------------------------------------------------------------------------------------------------------------------|----------|
| <b>Appendix Figure S1: Confocal images of U2OS cells expressing indicated MTS-GFP reporters with or without a diGly degron.</b>                                                                                    | <b>3</b> |
| <b>Appendix Figure S2: Amino acid sequence alignment of MIC19 from various species.</b>                                                                                                                            | <b>4</b> |
| <b>Appendix Figure S3: Live-cell images of indicated GFP fusion proteins in U2OS cells with or without DNCul2 or IMP-1088 treatment.</b>                                                                           | <b>5</b> |
| <b>Appendix Figure S4: Confocal immunofluorescence images of U2OS cells stained with MitoTracker, DAPI and a MIC19 antibody (Abcam, ab224565) under the same condition applied to Figs. 5F, 6A, EV4I and EV4J.</b> | <b>6</b> |

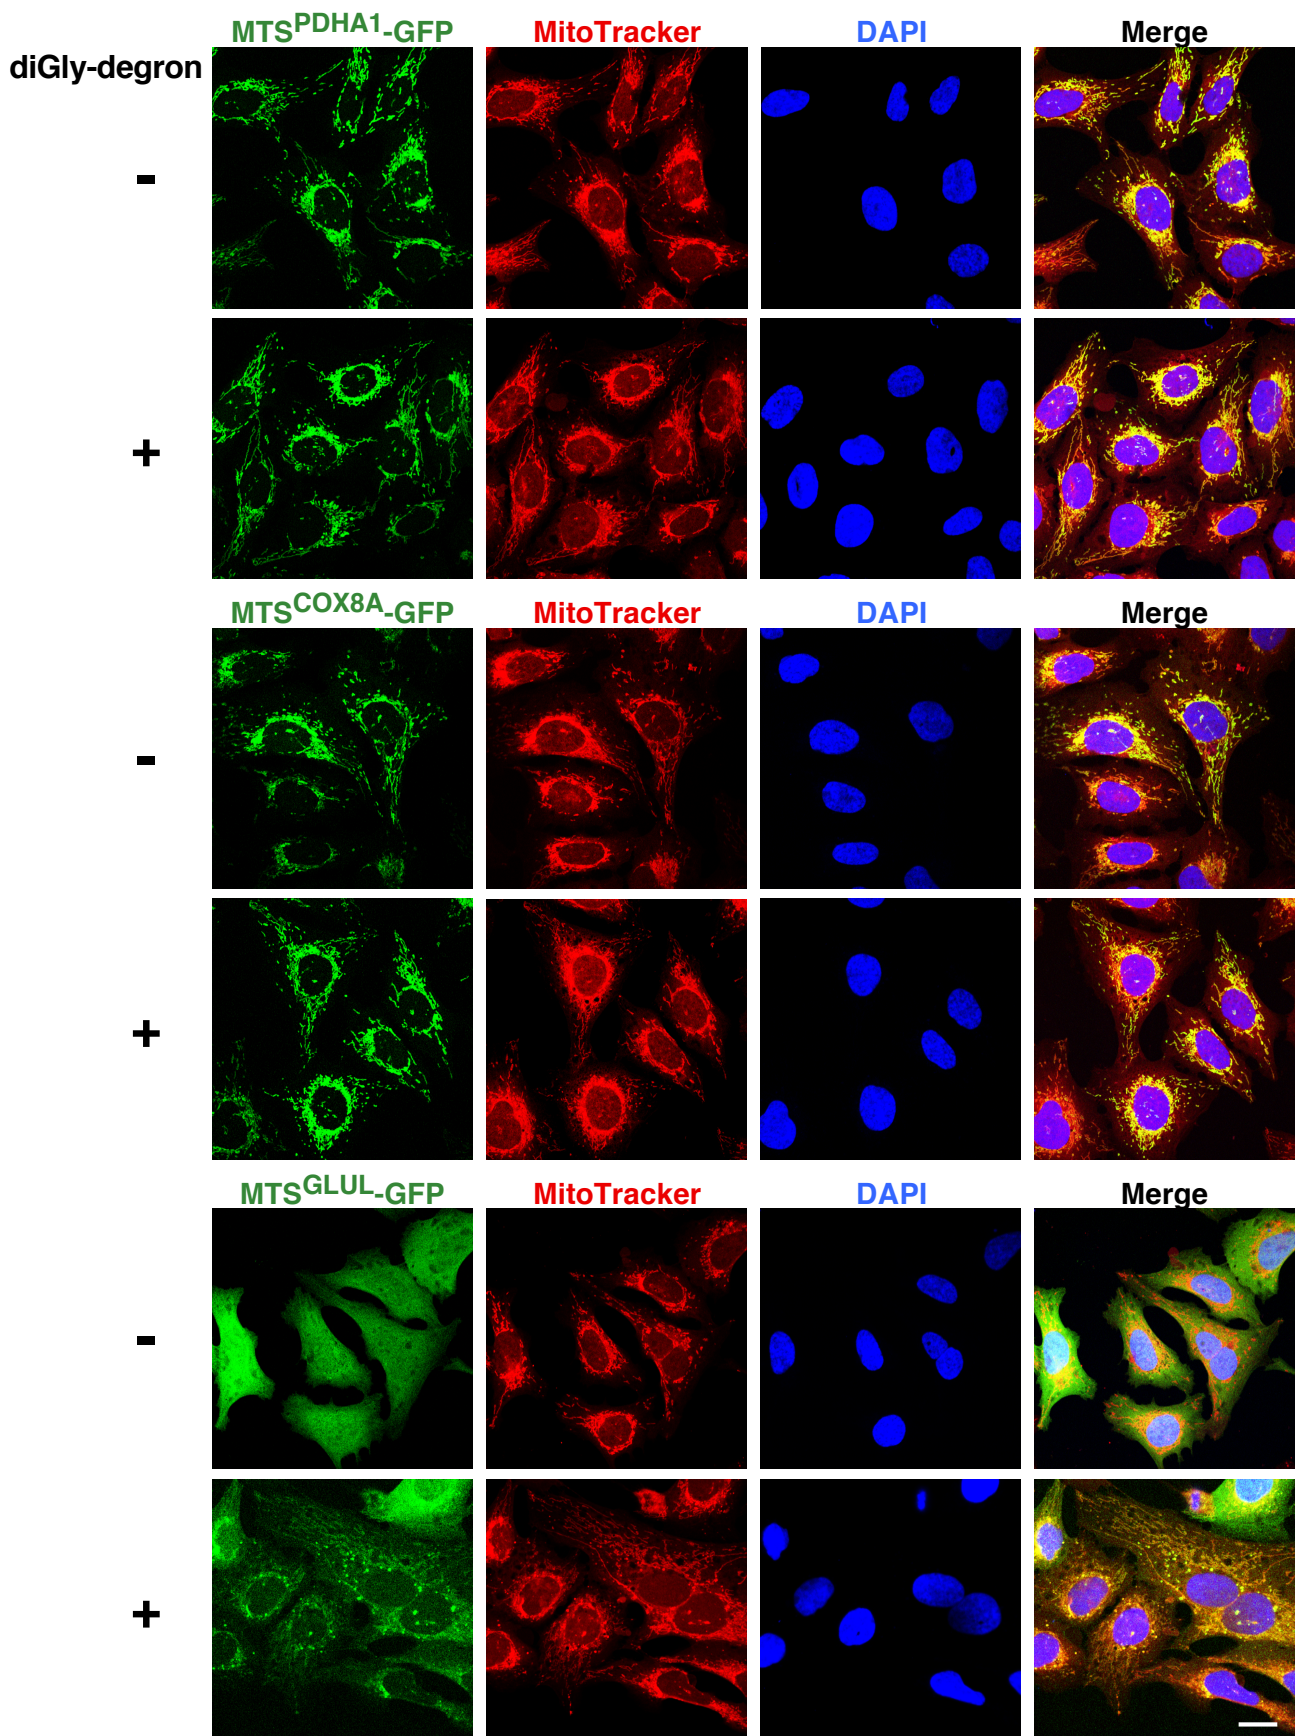

**Appendix Figure S1: Confocal images of U2OS cells expressing indicated MTS-GFP reporters with or without a diGly degron.**

MitoTracker and DAPI staining indicate mitochondria and nucleus, respectively. Scale bar = 20  $\mu\text{m}$ .

```

Human      1  MGGTTSRRRVTFEADENENITVVKGIRLSENVIDRMKE--SSPSG-SKSORYSGAYG-----
Chimpanzee 1  MGGTTSRRRVTFEADENENITVVKGIRLSENVIDRMKE--SSPSG-SKSORYSGAYG-----
Bovine     1  MGGTASRRRVTFEADENENITVVKGIRLSENVIDRMKE--SSPSG-SKSORYSGTYG-----
Mouse      1  MGGTASRRRVTFEADENENITVVKGIRLSENVIDRMKE--SSPSG-SKSORYSSVYG-----
Rat        1  MGGTASRRRVTFEADENENITVVKGIRLSENVIDRMKE--SSPSG-SKSORYSSVYG-----
Chicken    1  MGASGSTRRVTFEADENENITVVKGIRLSENVIDRMKEPSSPSGRPQSQRSP-----
Zebrafish  1  MGANNSTRRVTFEADENENITVVKGIRLSENVIDRMREPSCGFTS-PQVPSRPPAPPPVVDPLPALVQYLLHLTLSLFHPPPSLPERVKLPEQV
      *

Human      55  -----ASVDEELKRRVAEEL--ALEQAKKESDQKRL-----KQAKELDRERAAANEOLT
Chimpanzee 55  -----ASVDEELKRRVAEEL--ALEQAKKESDQKRL-----KQAKELDRERAAANEOLT
Bovine     55  -----ASVDEELKRRVAEEL--ALEQAKKESDQKRL-----KQAKELDRERAAANEOLT
Mouse      55  -----ASVDEELKRRVAEEL--ALEQAKKESDQKRL-----KQAKELDRERAAANEOLT
Rat        55  -----ASVDEELKRRVAEEL--ALEQAKKESDQKRL-----KQAKELDRERAAANEOLT
Chicken    54  -----GAVNDEELKRRVAEEL--ALEQAKKESDQKRL-----KQAKELDRERAAANEOLT
Zebrafish  95  STPAPPPPPPPPLESVGLSTPAVDSEELRKRKITEELRKGLEEDRRKTOEELNQWLEKEKSOAHAKAQAEQAQVKDEVSRILALEKSGAEETIQ

Human      104  RAILRERTCSEEEERAKAKHL-----AROLEEKDRVLKKODAFYKEQLARLEERSSEFYRVVTTEQYQKAAEVEEAKFKRYESHVPCADLQAKILQC
Chimpanzee 104  RAILRERISSEEEERAKAKHLDIEDKAROLEEKDRVLKKODAFYKEQLARLEERSSEFYRVVTTEQYQKAAEVEEAKFKRYESHVPCADLQAKILQC
Bovine     104  RAILRERISNEEEERAKAKHL-----AROLEEKDRVLKKODAFYKEQLARLEERSSEFYKVTTEQYQKAAEVEEAKFKRYESHVPCADLQAKILQC
Mouse      104  RAILRERISSEEEERAKAKHL-----AROLEEKDRVLKKODAFYKEQLARLEERSSEFYKVTTEQYQKAAEVEEAKFKRYESHVPCADLQAKILQC
Rat        104  RAILRERISSEEEERAKAKHL-----AROLEEKDRVLKKODAFYKEQLARLEERSSEFYKVTTEQYQKAAEVEEAKFKRYESHVPCADLQAKILQC
Chicken    113  RAILRERAAATEEEERAKAKHL-----AROLEEKDRVLKKODAFYKEQLARLEERSSEFYKVTTEQYQKAAEVEEAKFKRYESHVPCADLQAKILQC
Zebrafish  190  RAILRERISSEEEERAKAKHL-----AROLEEKDRVLKKODAFYKEQLARLEERSSEFYKVTTEQYQKAAEVEEAKFKRYESHVPCADLQAKILQC

Human      194  YRENTHQTLKCSALATQYMHCVNHAK-OSMLEKGG
Chimpanzee 199  YRENTHQTLKCSALATQYMHCVNHAK-OSMLEKGG
Bovine     194  YRONTQOTLSCSALASQYMRVCVNQAK-OSTLEKGG
Mouse      194  YRONTQOTLSCSALASQYMHCVNHAK-OSMLEKGG
Rat        194  YRONTQOTLSCSALANQYMHCVNHAK-OSMLEKGG
Chicken    203  YQOHAQETLSCSALANQYMHCVNHAK-OSMLEGRGG
Zebrafish  285  YRENAGKTLKCSALASQYMHCVNHAK-OSMLEKGG

```

**Appendix Figure S2: Amino acid sequence alignment of MIC19 from human (*Homo sapiens*), chimpanzee (*Pan troglodytes*), bovine (*Bos taurus*), mouse (*Mus musculus*), rat (*Rattus norvegicus*), chicken (*Gallus gallus*) and zebrafish (*Danio rerio*).**

The myristoylation site is highlighted with an asterisk, and the C-terminal diGLy motif is shown in the box. The CHCH domain is underlined.

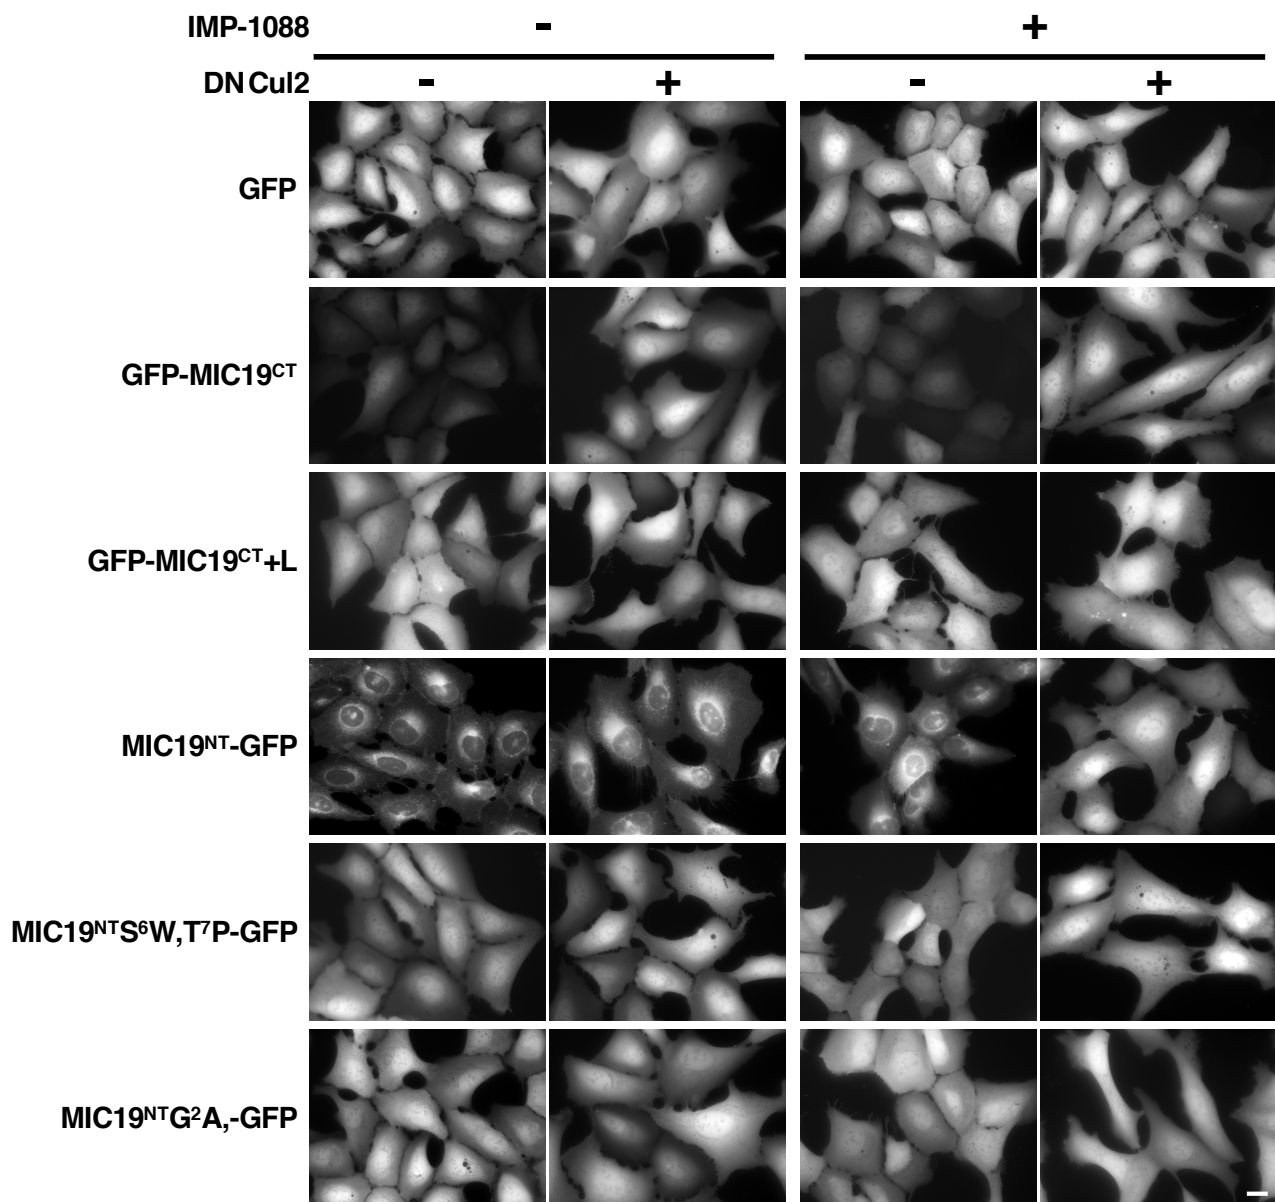

**Appendix Figure S3: Live-cell images of indicated GFP fusion proteins in U2OS cells with or without DNCuI2 or IMP-1088 treatment.**

Scale bar = 20  $\mu$ m.

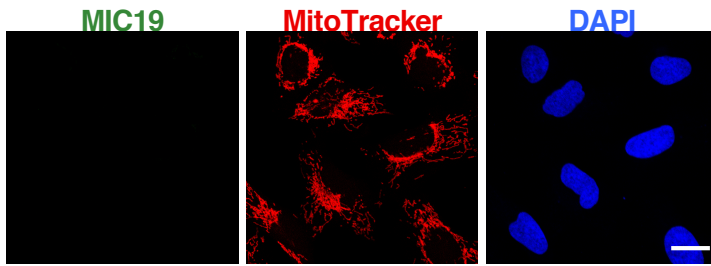

**Appendix Figure S4: Confocal immunofluorescence images of U2OS cells stained with MitoTracker, DAPI and a MIC19 antibody (Abcam, ab224565) under the same condition applied to Figs. 5F, 6A, EV4A and EV4C.**

Scale bar = 20  $\mu\text{m}$ .
