# Supplementary figures and images for: The C‐degron pathway eliminates mislocalized proteins and products of deubiquitinating enzymes
Source: PubMed Central journal article supplement — EMBO J. 2021 Jan 20;40(7):e105846. doi: 10.15252/embj.2020105846 (PMC8013793; doi:10.15252/embj.2020105846), 2021-01-20

# Source data for Fig. 5

## C

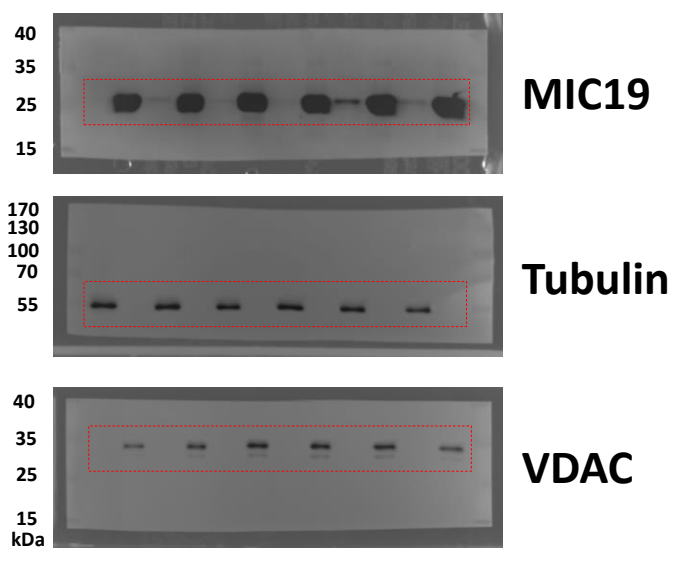

Supplement: EMBJ-40-e105846-s003.pdf [file EMBJ-40-e105846-s003.pdf]

# Source data for Fig. 4

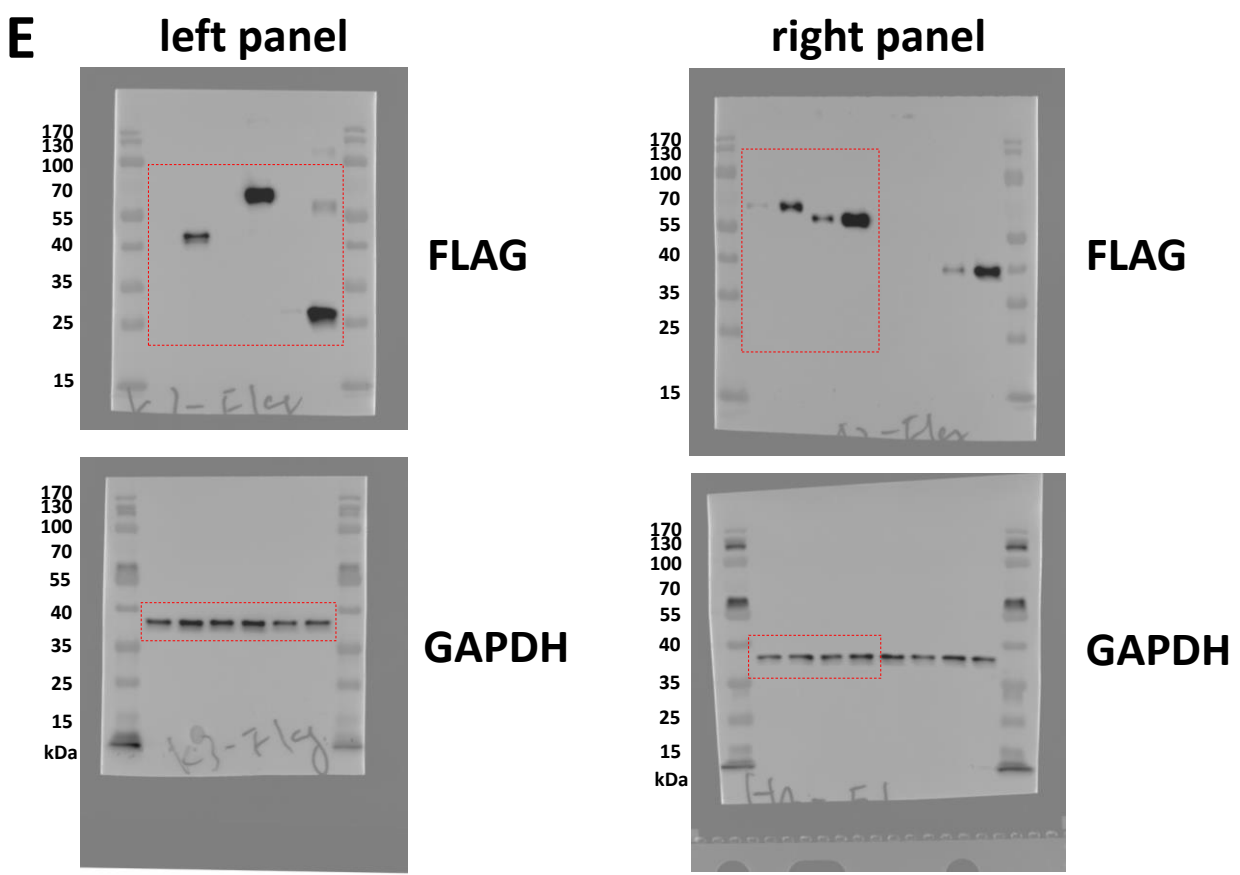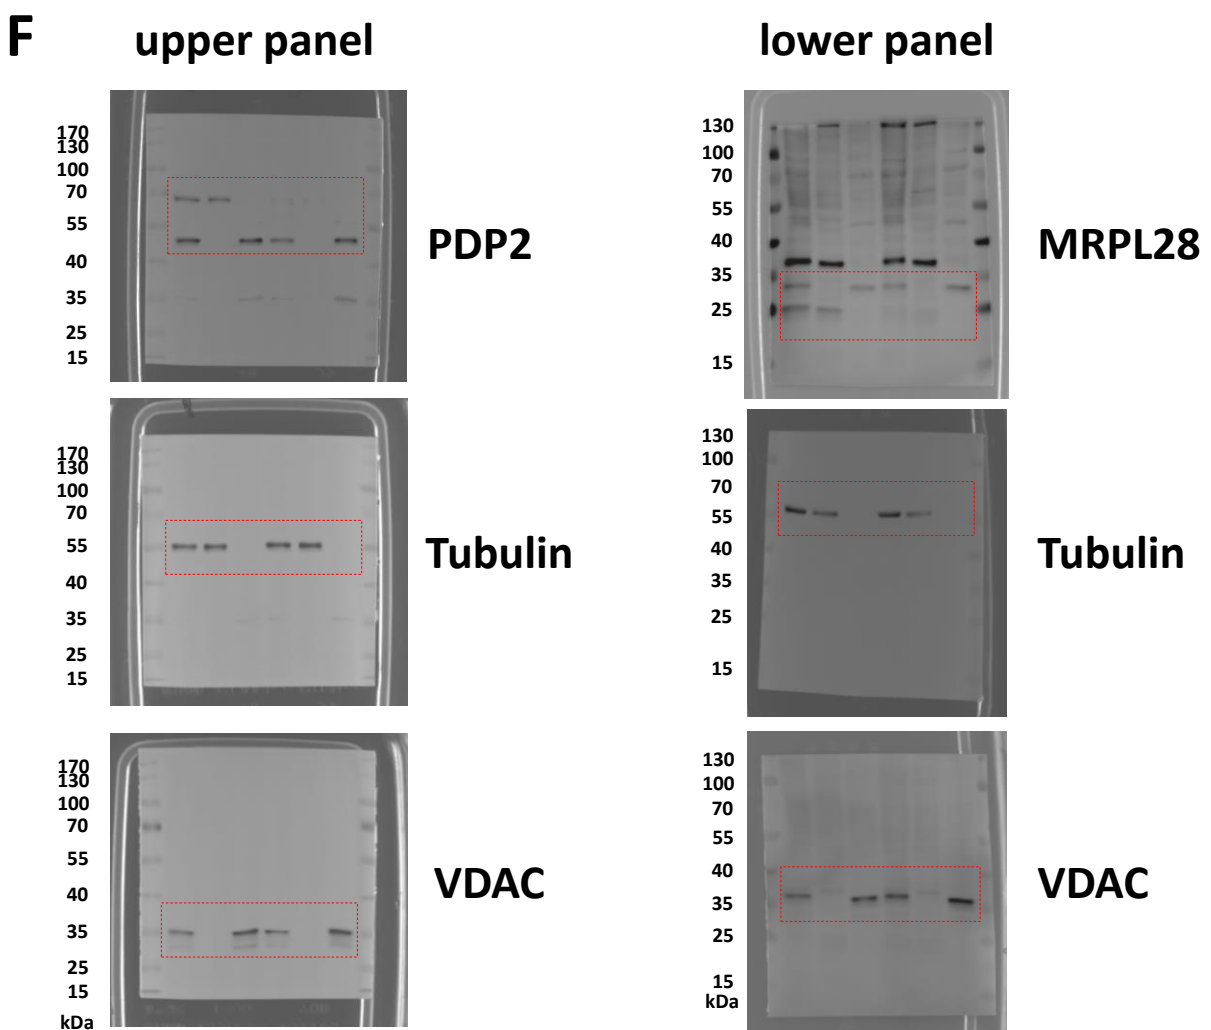

# Source data for Fig. 4

## G upper panel

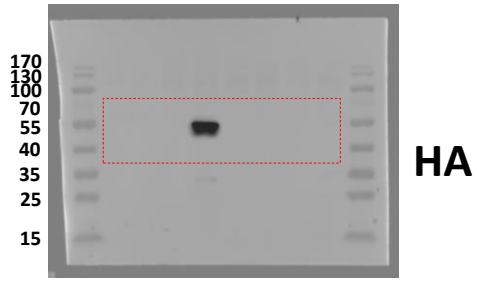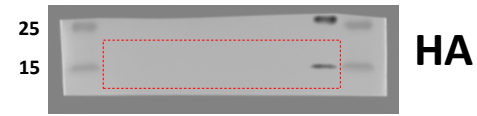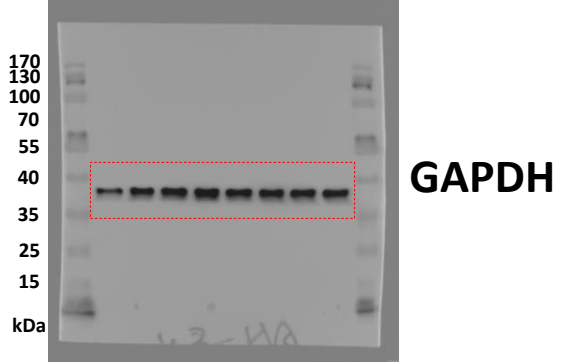

## lower panel

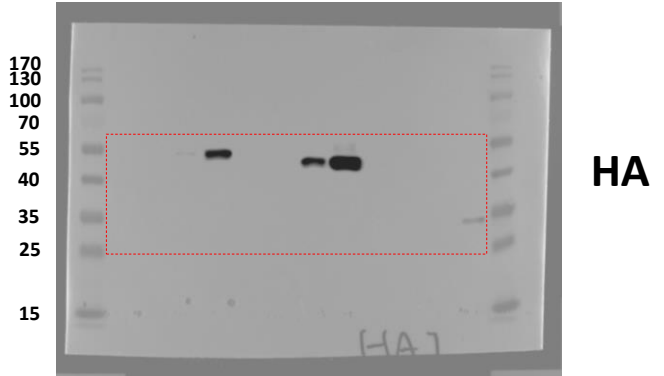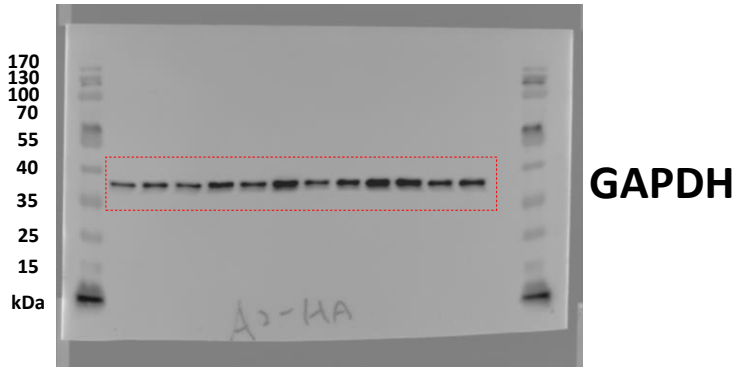

Supplement: EMBJ-40-e105846-s005.pdf [file EMBJ-40-e105846-s005.pdf]

# Source data for Fig. EV3

## B

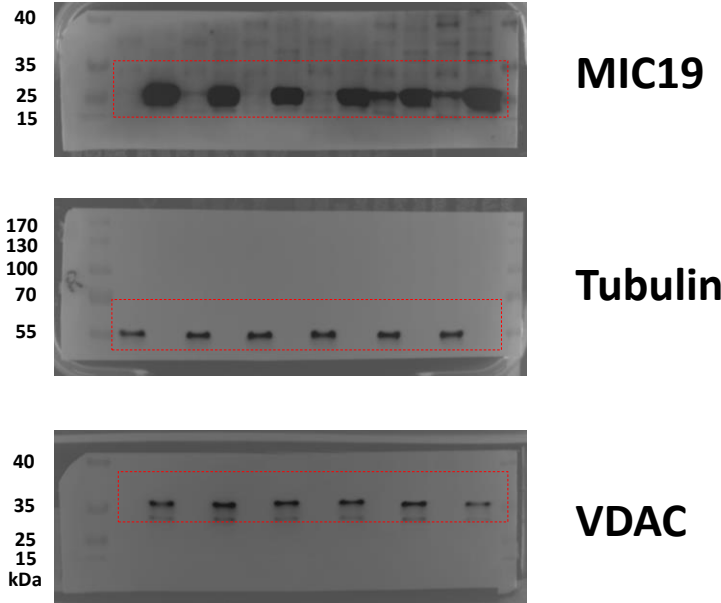

# Source data for Fig. EV4

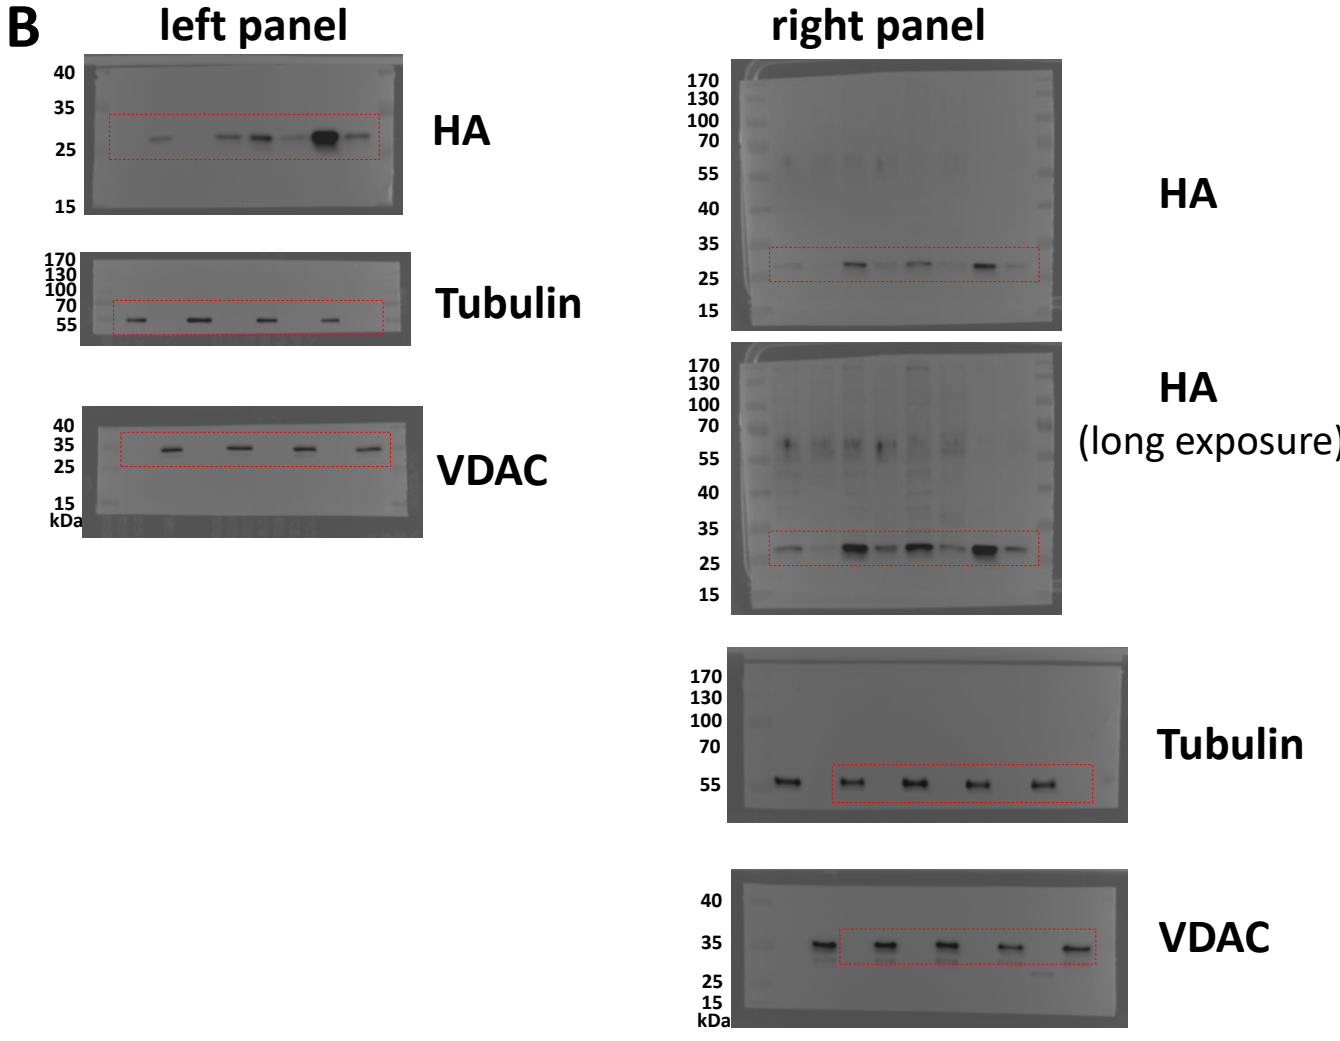

# Source data for Fig. EV5

## A

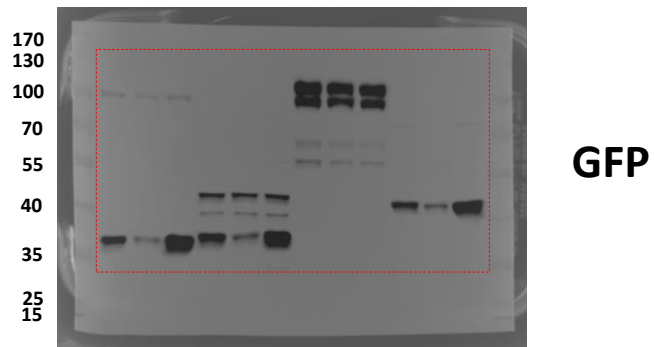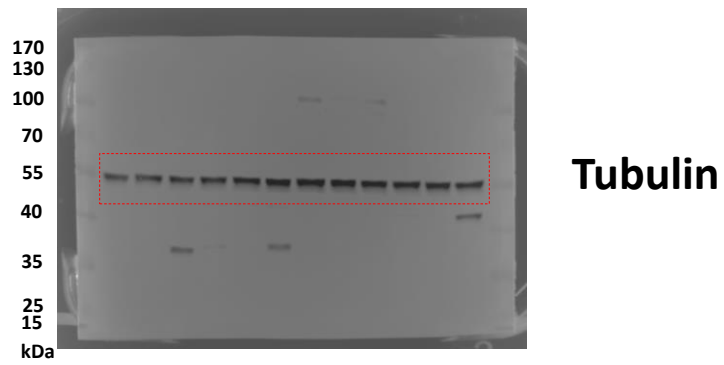

Supplement: EMBJ-40-e105846-s007.pdf [file EMBJ-40-e105846-s007.pdf]

# Source data for Fig. 6

## B

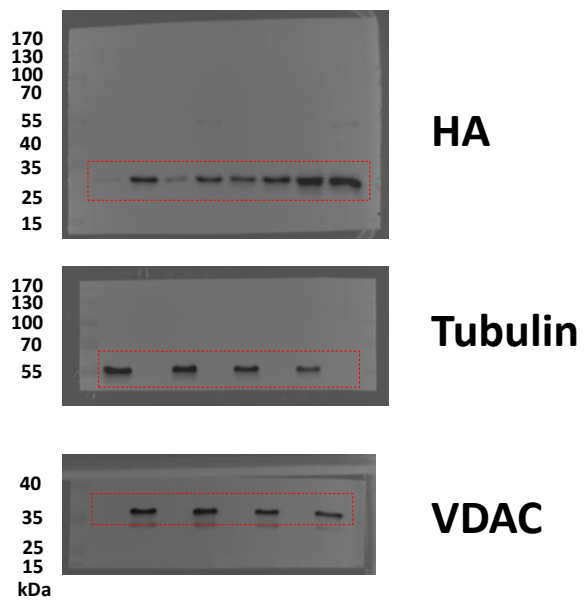

Supplement: EMBJ-40-e105846-s011.pdf [file EMBJ-40-e105846-s011.pdf]
